# Supplementary material for: NPC1 Confers Metabolic Flexibility in Triple Negative Breast Cancer
Source: MDPI journal article supplement (doi:10.3390/cancers14143543), 2022-07-21

Blot 1B

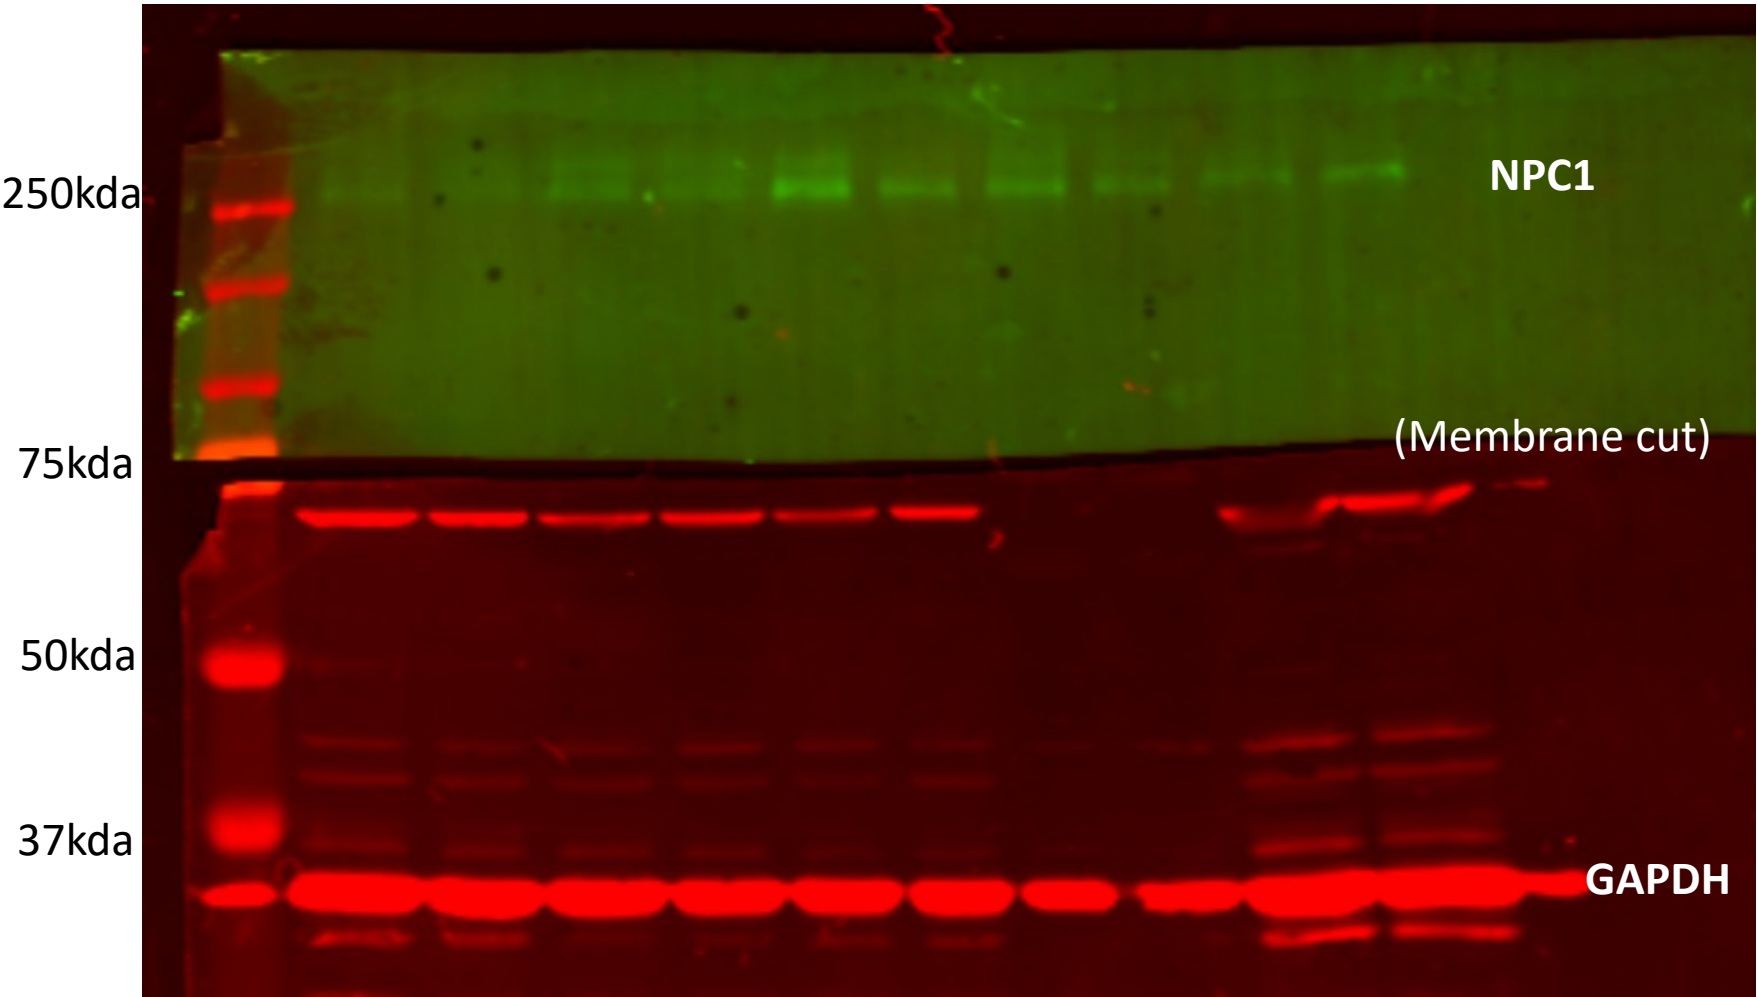

Blot 1F

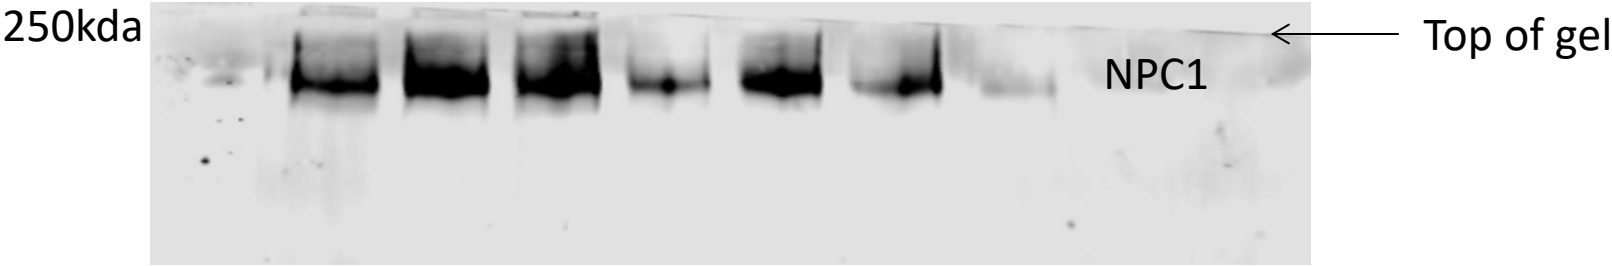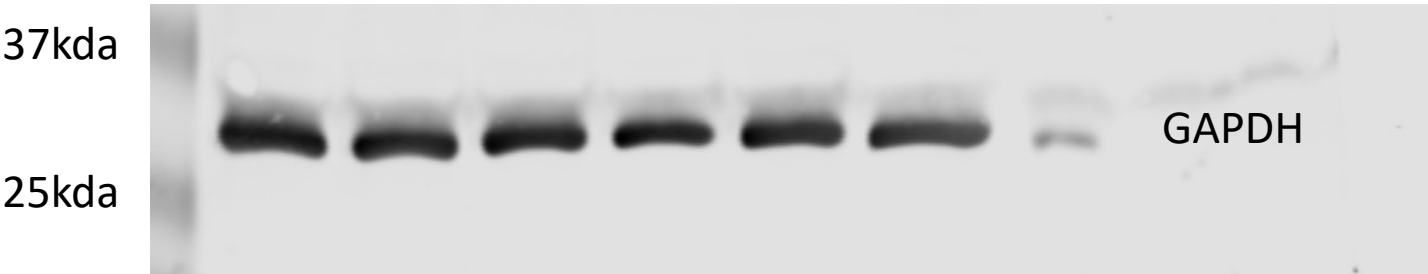

Blot 1H

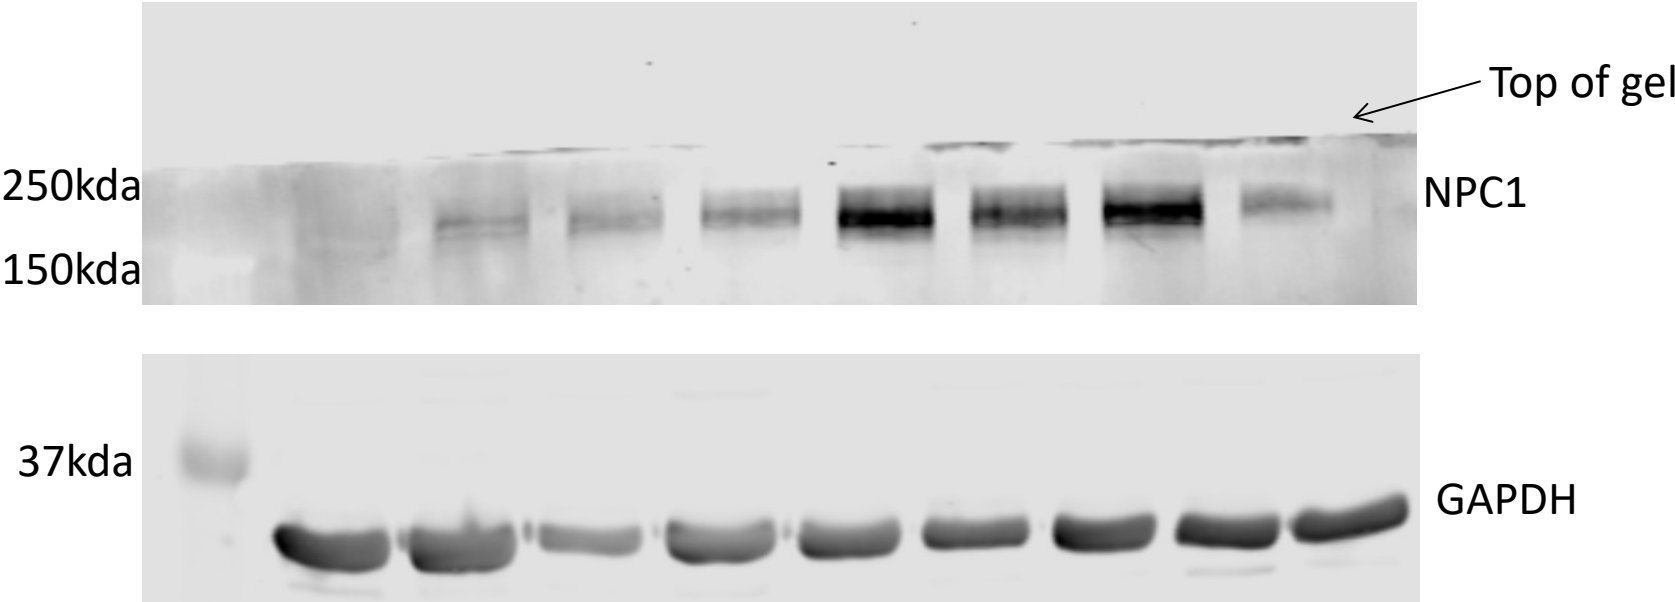

Blot 2A

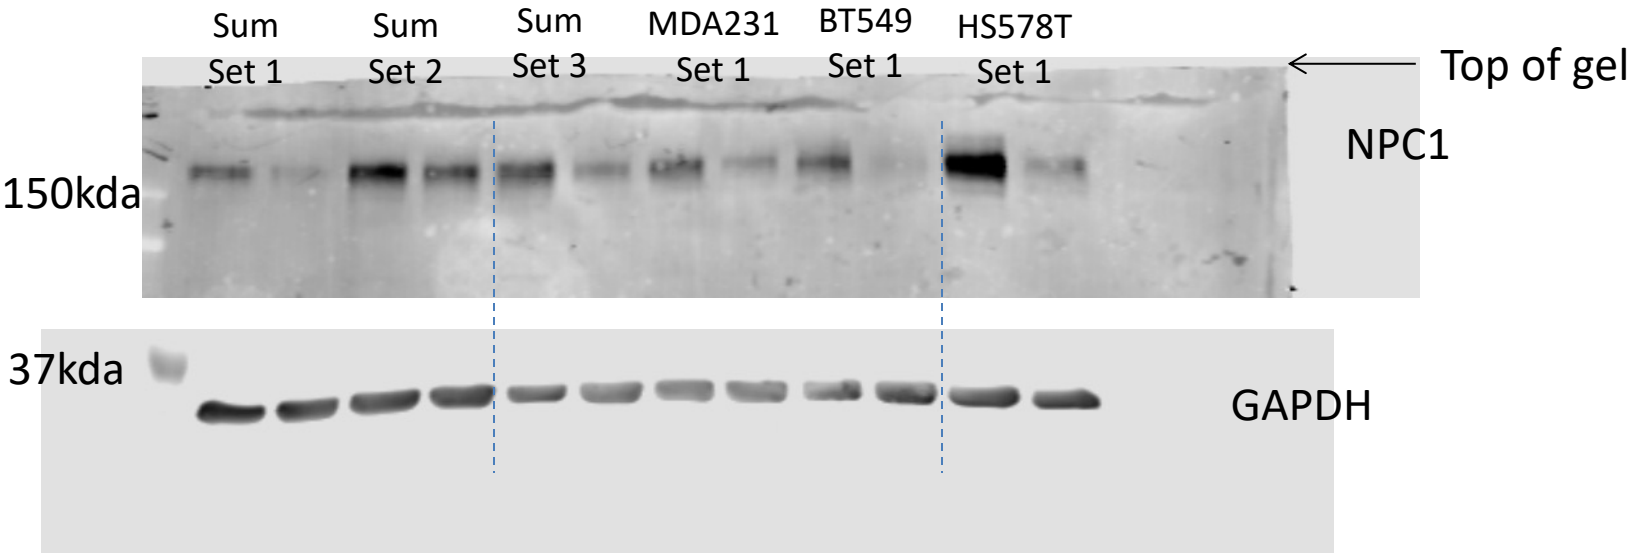

Blot 3C

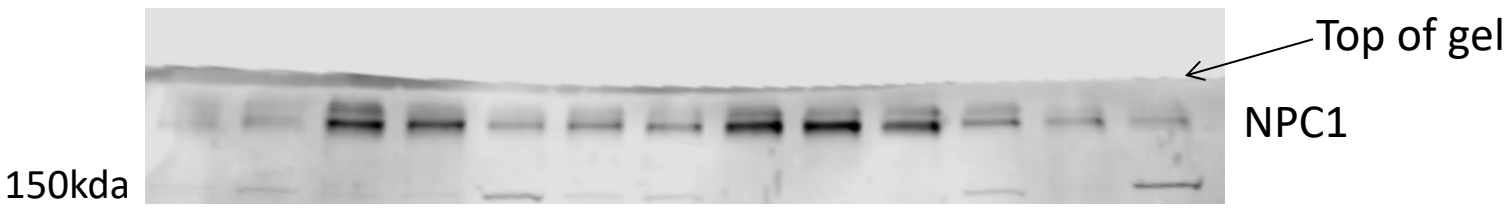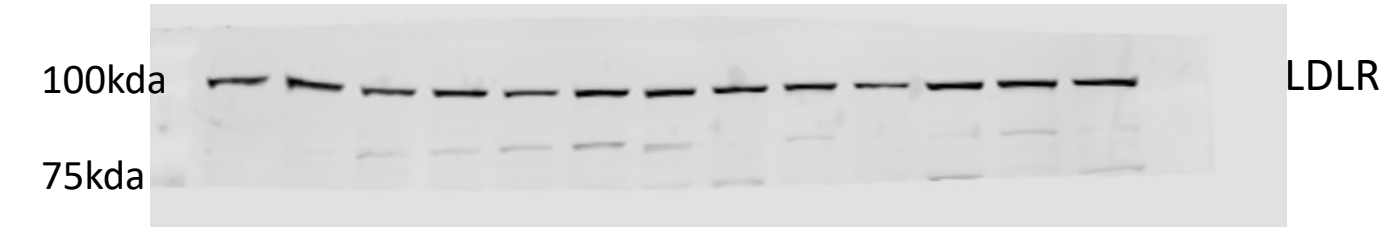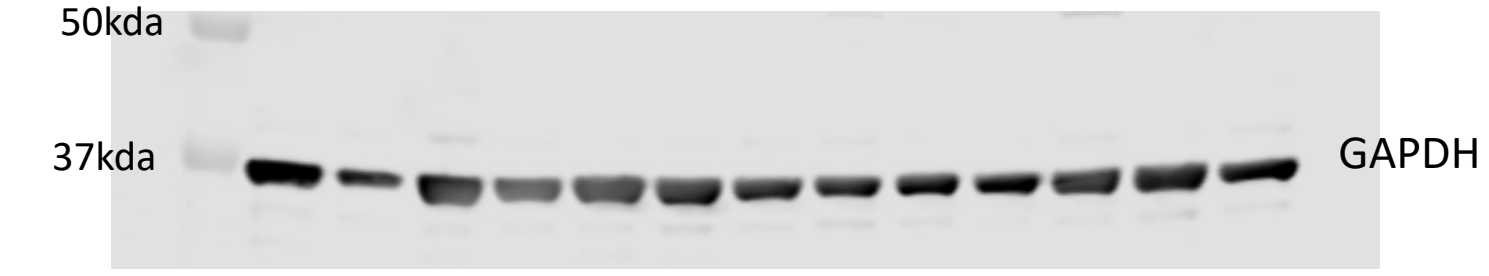

Blot 3C

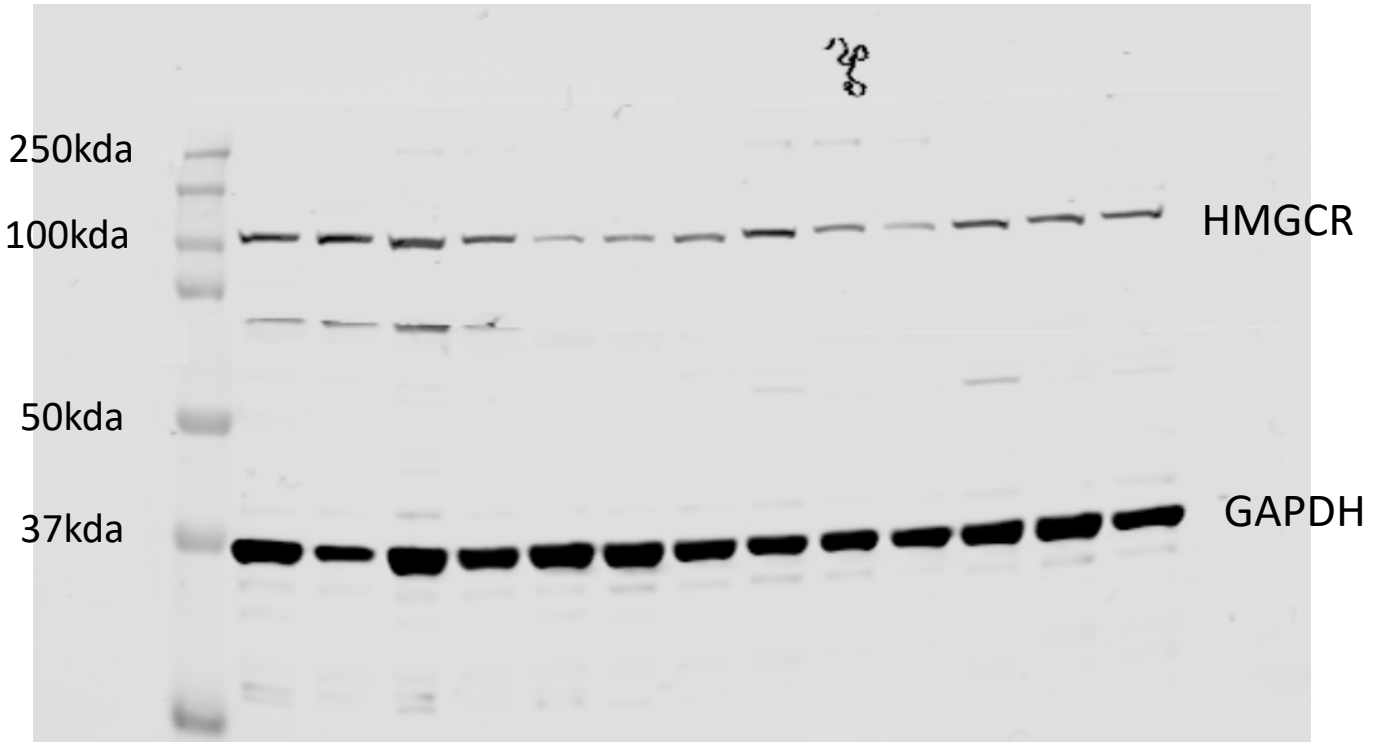

Blot 3E

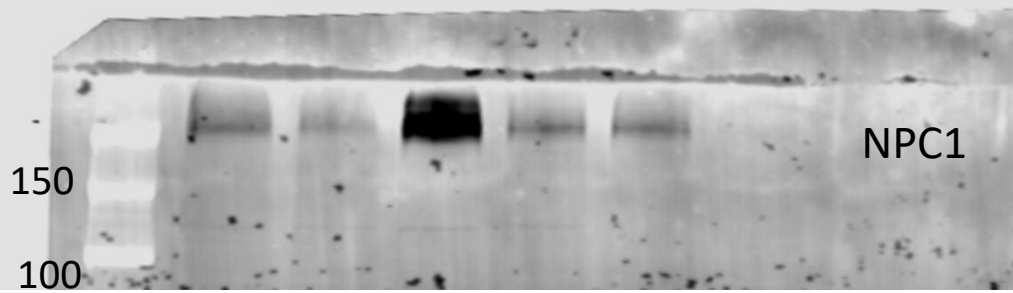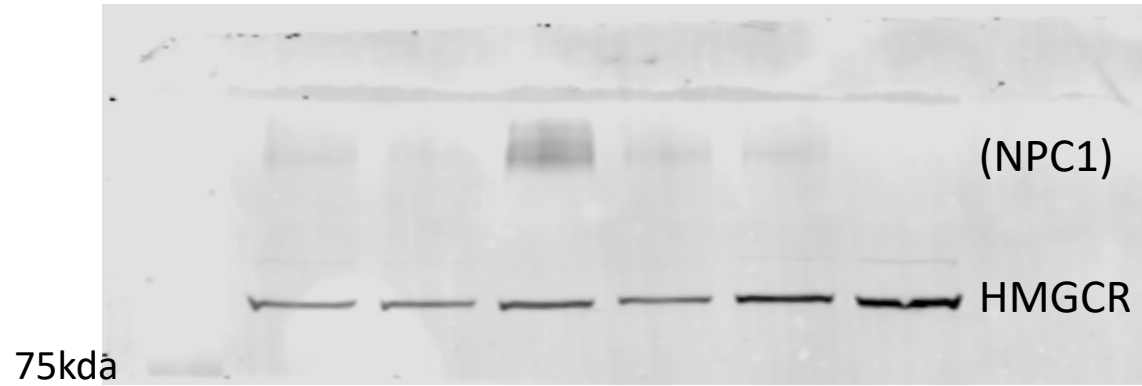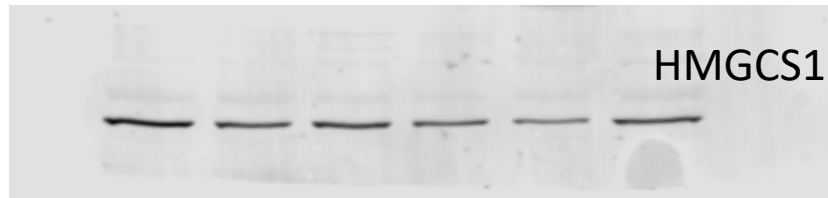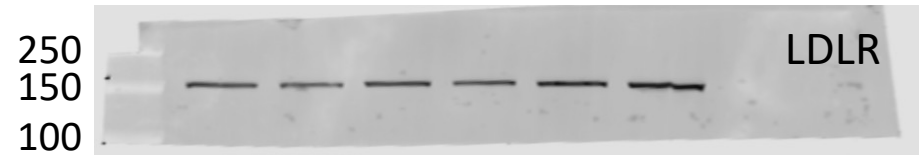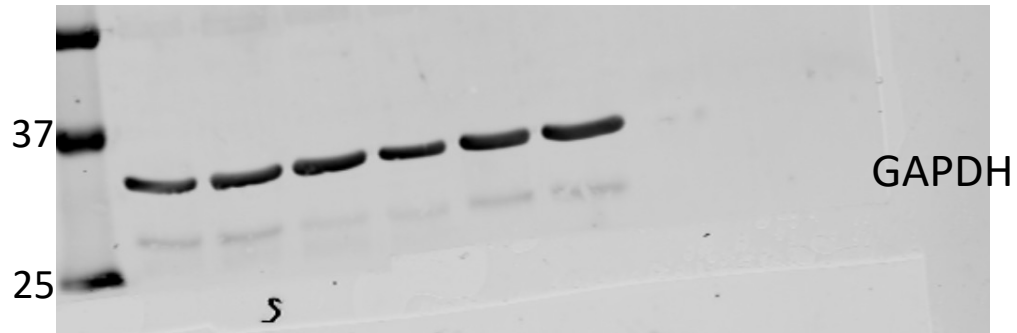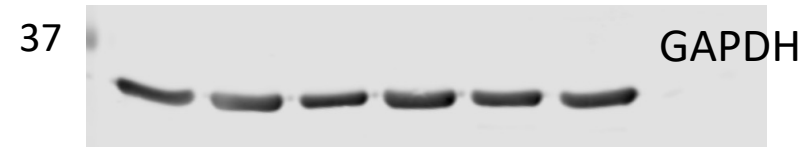

Blot 5A

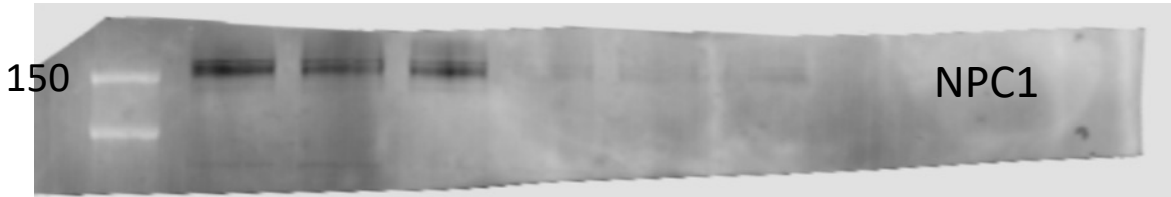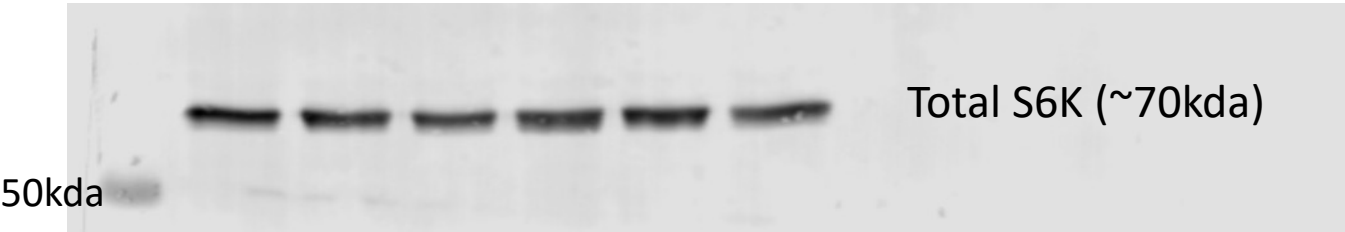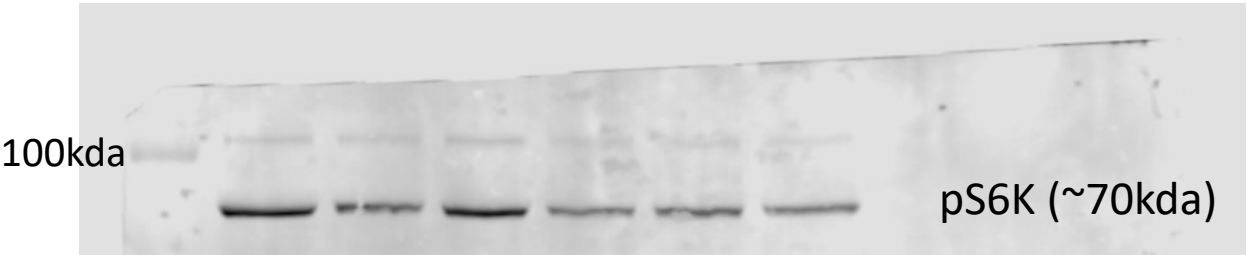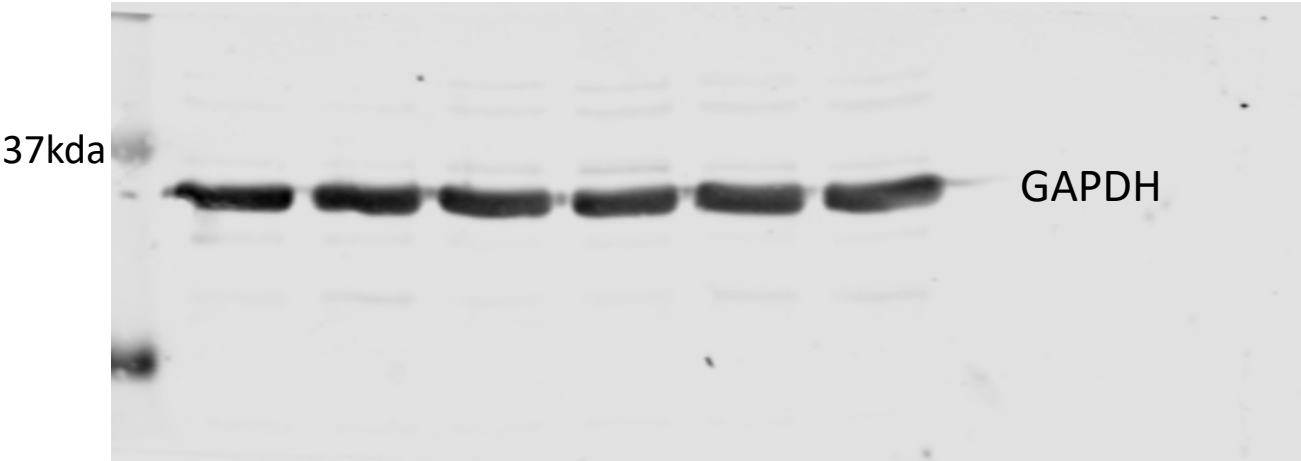



Blot 5B (1 of 2)

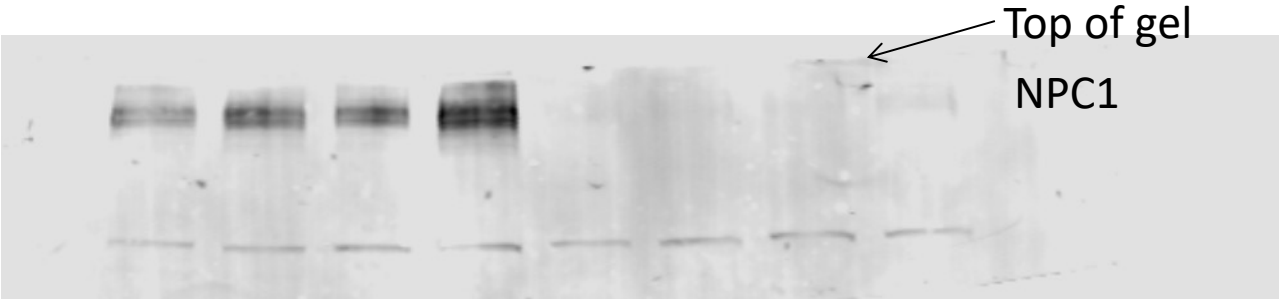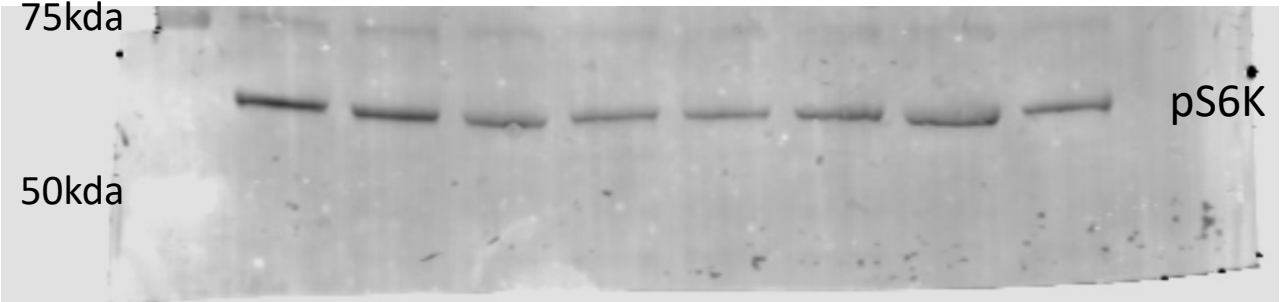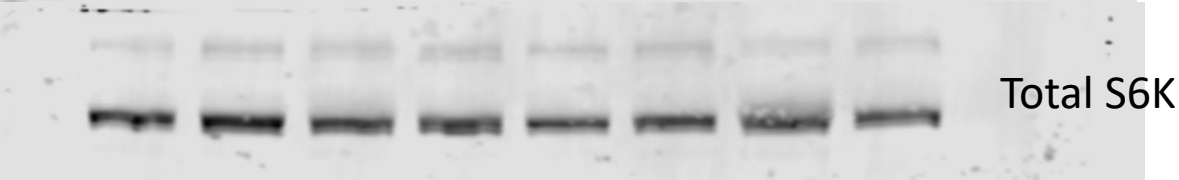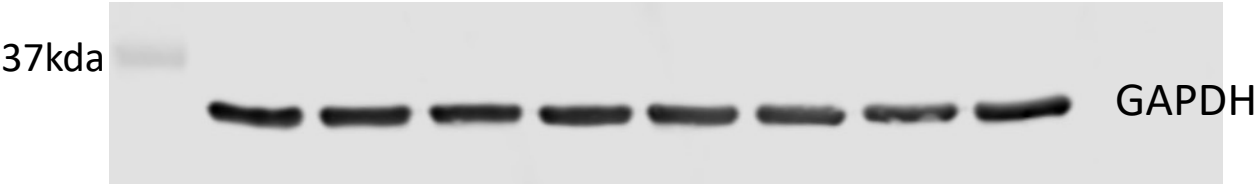

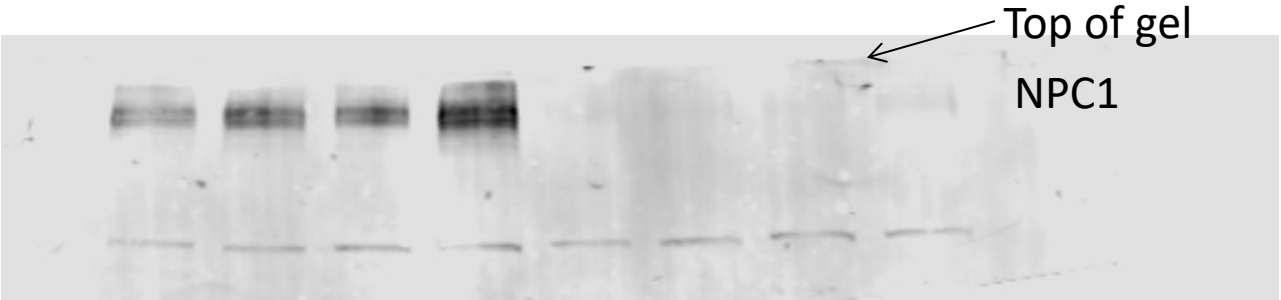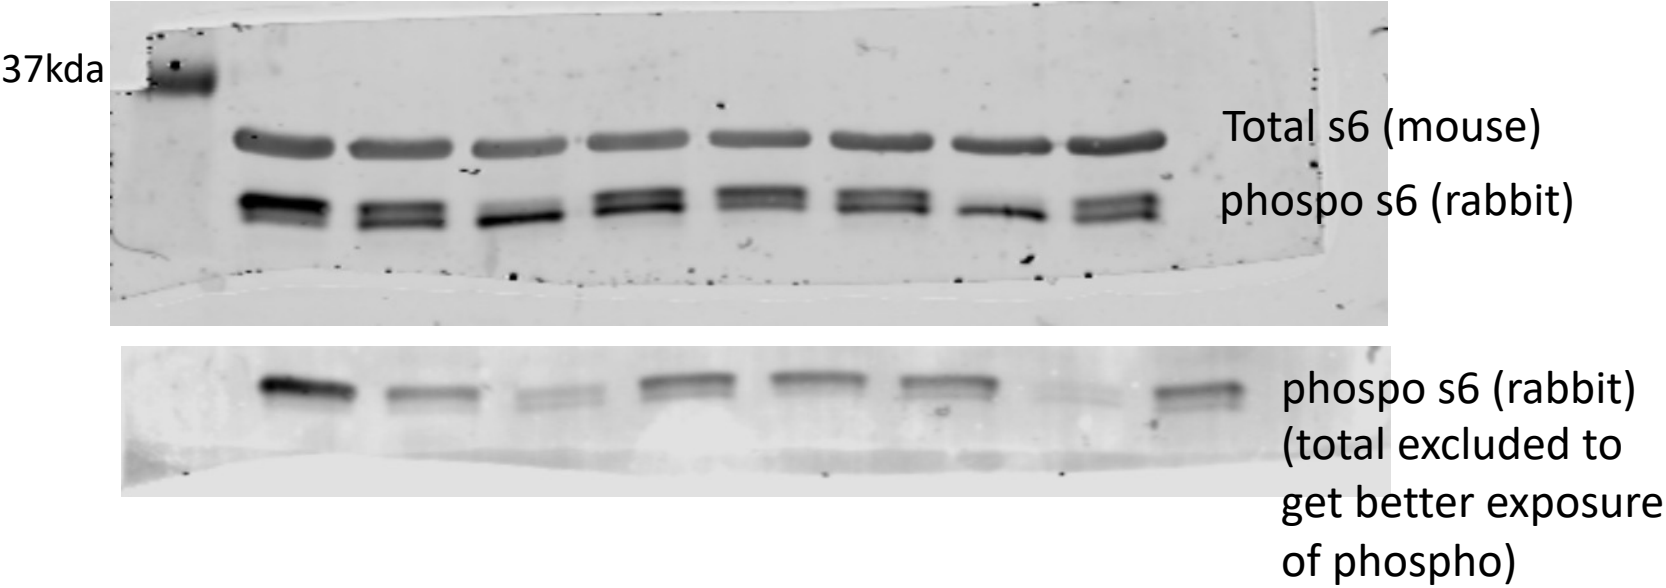

Blot 5C (1 of 2)

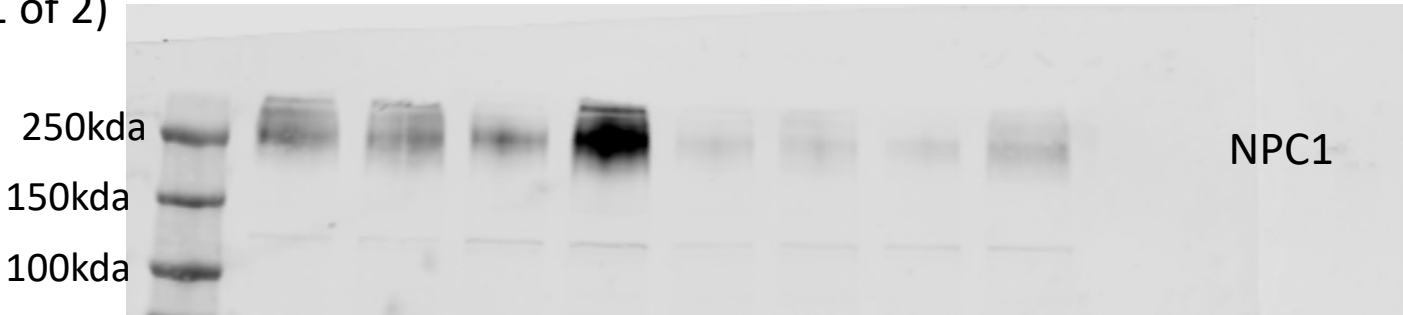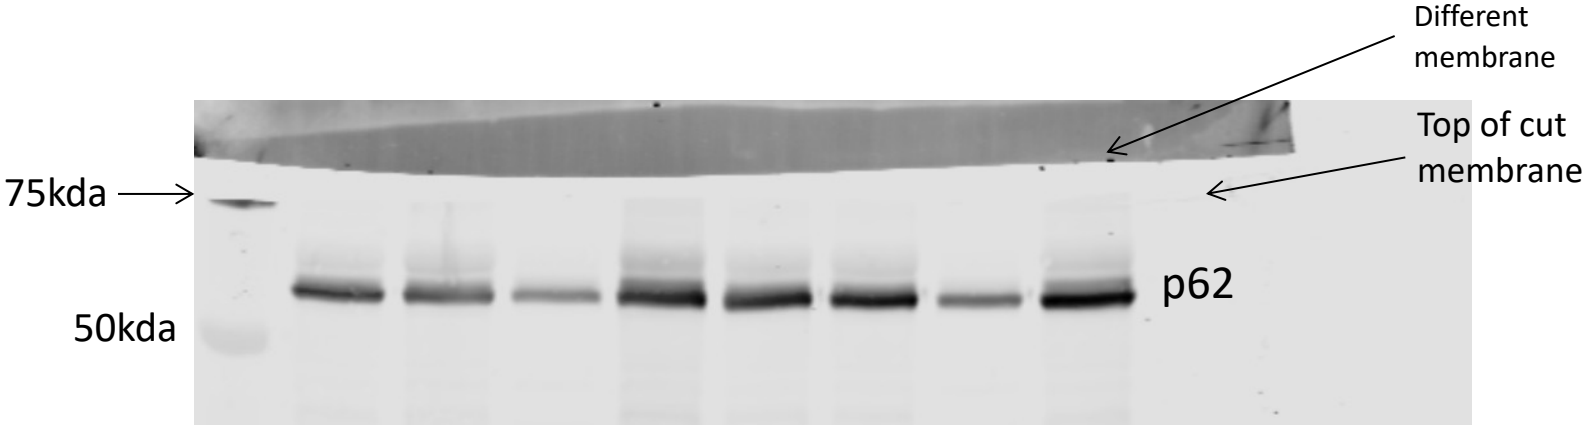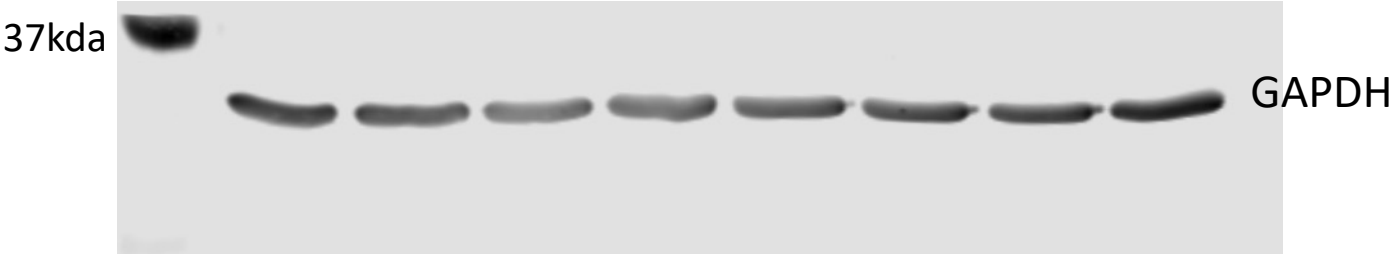



Blot Supp. 1F (Same western as 1B)

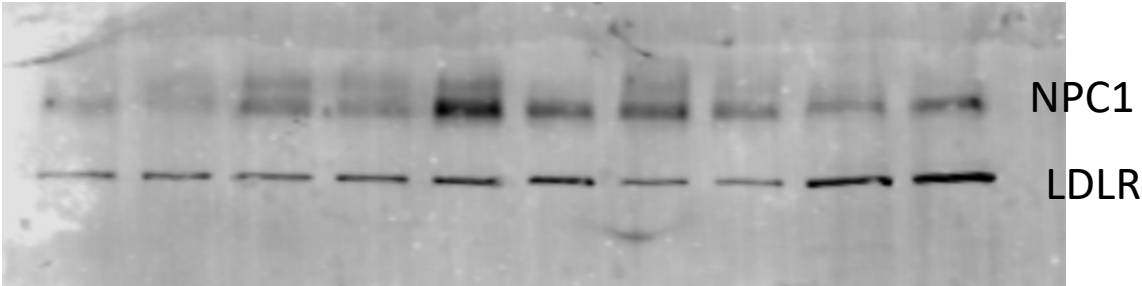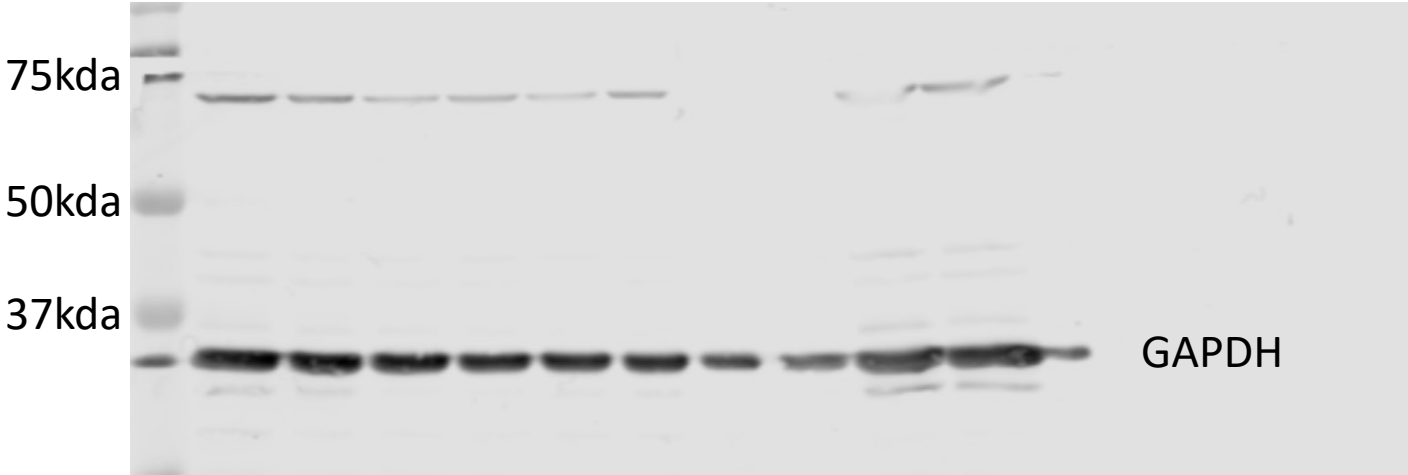

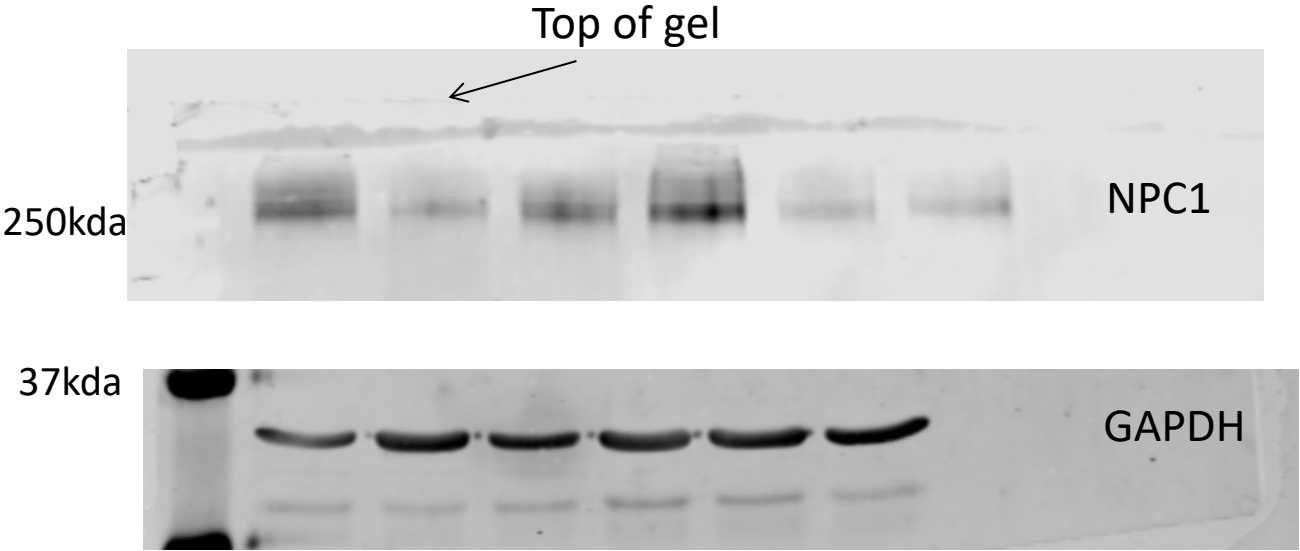

Blot Supp. 4F

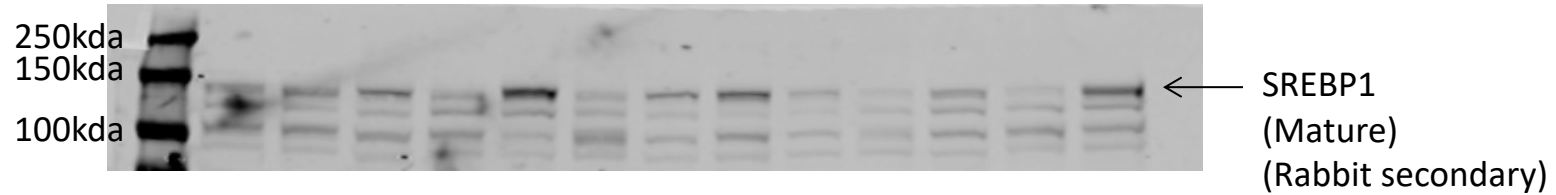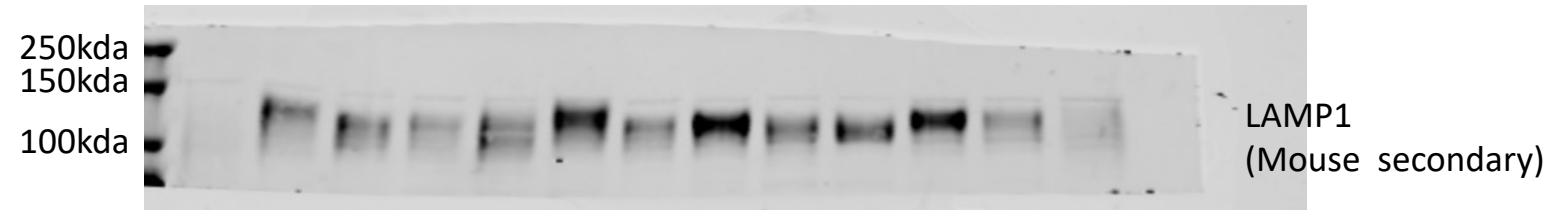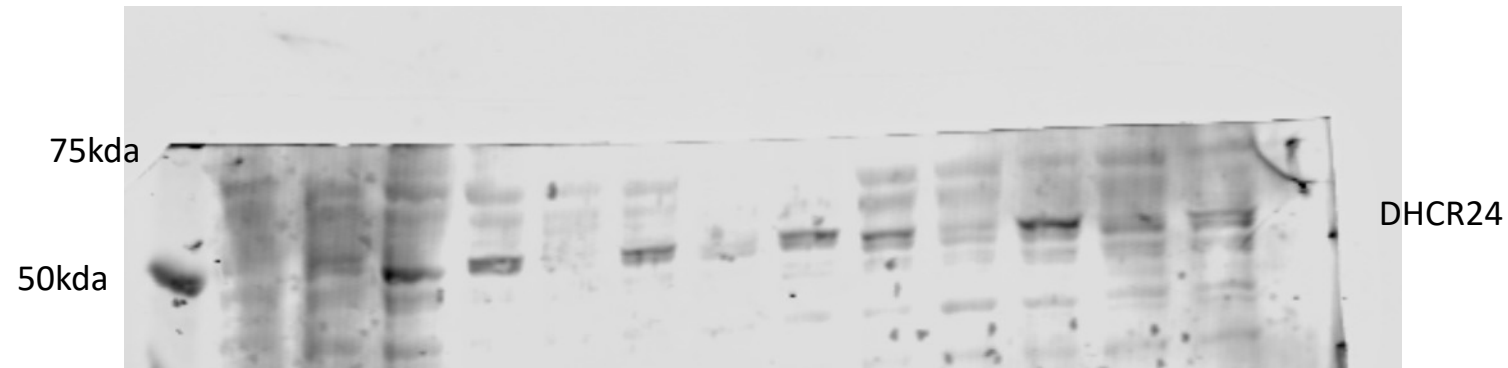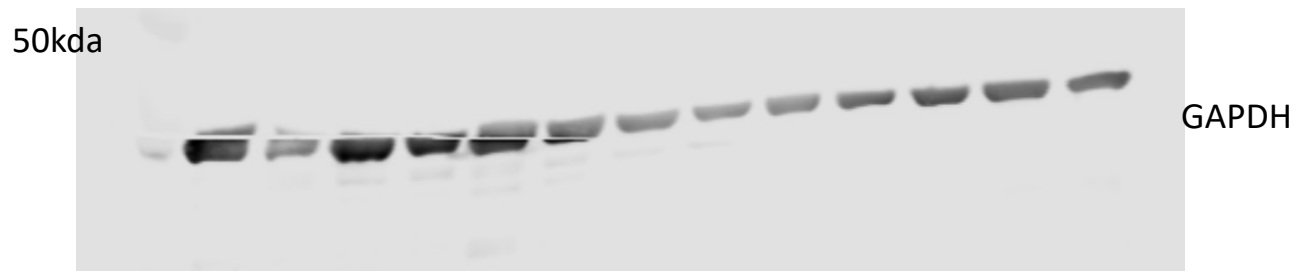

Blot Supp. 8a

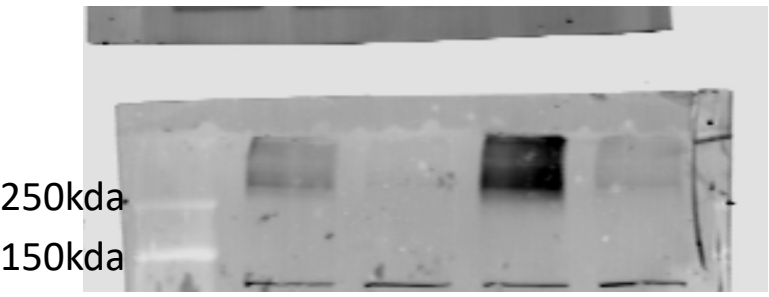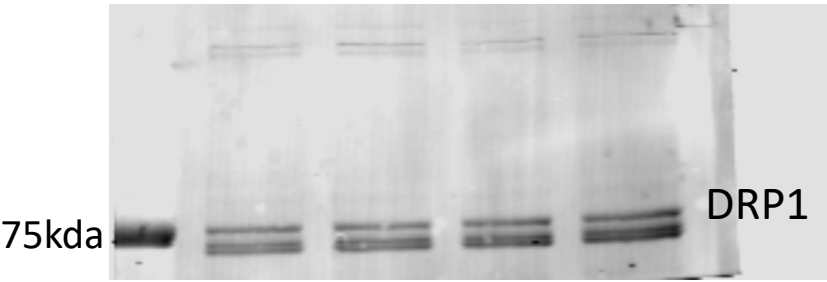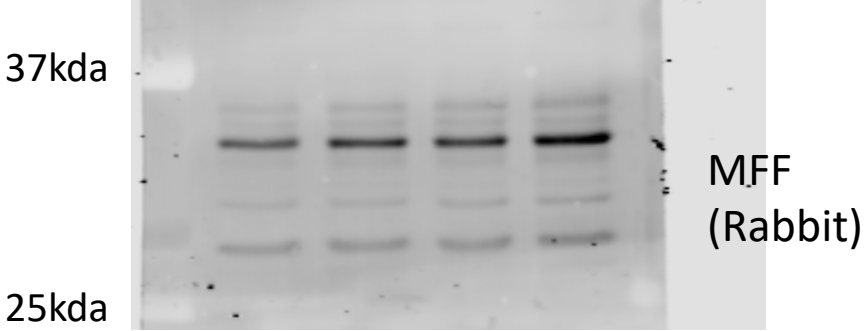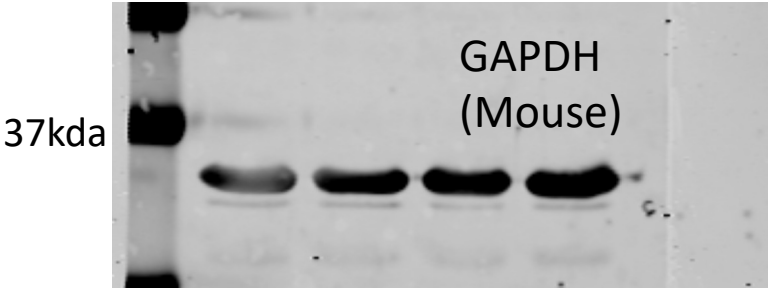

Supplement: s1 [file s1]
